# Supplementary material
Source: Research Square preprint supplement (doi:10.21203/rs.3.rs-9412915/v1)
Supplement: Supplementary file 1 [file 35acedb4d5477dc8281c0ce3.docx]

Supplementary Table 1. In vitro dissolution and in vivo relative bioavailability parameters of various development tablets (FDA 2019; FDA 2019)

| Tablet | Dissolution at 20min (Mean, %) | Tmax  (Mean, h) | Cmax GMR  (90% CI) | AUCinf GMR  (90% CI) | Dissolution profile |
| --- | --- | --- | --- | --- | --- |
| Tablet A | 32.8 | 4.00 | 57.23  [53.29, 61.46] | 93.65  [91.18, 96.19] | 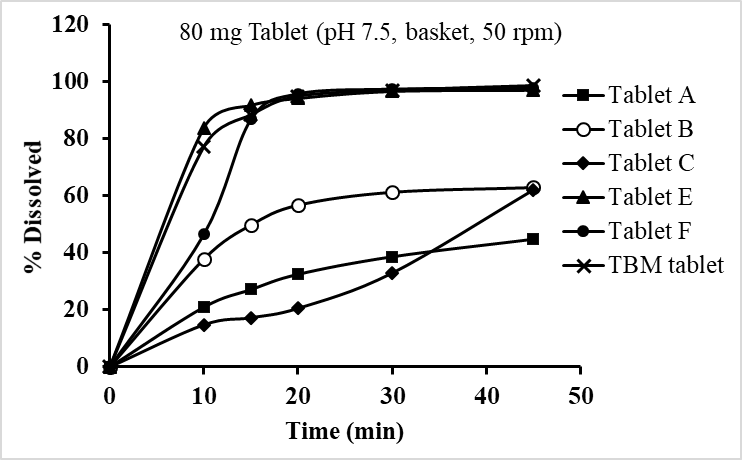 |
| Tablet B | 55.9 | 1.00 | 53.60  [48.49, 59.24] | 98.43  [87.43, 110.82] |
| Tablet C | 20.3 | 1.25 | 81.55  [72.91, 91.23] | 110.12  [96.44, 125.73] |
| Tablet E | 94.4 | 2.52 | 81.34  [73.29, 90.27] | 92.44  [80.85, 105.69] |
| Tablet F | 96.2 | 2.00 | 83.19  [72.39, 95.60] | 98.66  [85.40, 113.99] |
| TBM tablet | 94.5 | 2.00 | 71.82  [66.75, 77.28] | 101.17  [96.77, 105.77] |

Notes: GMR: geometric mean ratio; CI: confidence interval; TBM: to-be-marketed.

Supplementary Table 2. Single-dose and simulated multiple-dose data of the TBM tablet versus capsule (FDA 2019)

|  | | | Cmax (μg/mL) Geometric means | | |  | |
| --- | --- | --- | --- | --- | --- | --- | --- |
| Regimen | Food condition | Tablet  (Test) | | Capsule  (Reference) | Ratio (%)  (Test/Reference) | | 90% CI for ratio  (%) |
| Single-dose | Fasted | 3.39 (n= 29) | | 4.71 (n= 27) | 71.82 | | 66.75 ~ 77.28 |
| Single-dose | Fed | 2.68 (n= 28) | | 2.97 (n= 28) | 90.01 | | 79.94 ~ 101.36 |
| Multiple-dose | Fasted | 12.09 (n= 29) | | 13.29 (n= 27) | 90.94 | | 87.06 ~ 95.00 |
| Multiple-dose | Fed | 12.43 (n= 28) | | 13.47 (n= 28) | 92.30 | | 83.92 ~ 101.51 |
|  | | | AUC (μg· h/mL) Geometric means | | |  | |
| Regimen | Food condition | Tablet  (Test) | | Capsule  (Reference) | Ratio (%)  (Test/Reference) | | 90% CI for ratio  (%) |
| Single-dose | Fasted | 235 (n= 29) | | 232 (n= 27) | 101.17 | | 96.77 ~ 105.77 |
| Single-dose | Fed | 259 (n= 28) | | 276 (n= 28) | 93.75 | | 85.25 ~ 103.11 |
| Multiple-dose | Fasted | 235 (n= 29) | | 232 (n= 27) | 101.19 | | 96.75 ~ 105.83 |
| Multiple-dose | Fed | 259 (n= 28) | | 276 (n= 28) | 93.70 | | 85.13 ~ 103.12 |

Supplementary Table 3. Statistical comparison of single-dose food-effect of the TBM tablet versus capsule (FDA 2019)

| Pharmacokinetic parameters | Geometric means | | Ratio (%)  (Fed/Fasted) | 90% CI for Ratio (%) | |
| --- | --- | --- | --- | --- | --- |
| TBM tablet-Fed | TBM tablet-Fasted | Lower | Upper |
| N | 28 | 28 | — | — | — |
| Tmax (h) | 3.00 [0.50 ~ 8.03] | 2.00 [0.50 ~ 6.02] | — | — | — |
| Cmax (μg/mL) | 2.68 | 3.38 | 79.18 | 68.58 | 91.43 |
| AUC0-72h (μg· h/mL) | 102 | 102 | 99.24 | 88.91 | 110.76 |
| AUClast (μg· h/mL) | 250 | 225 | 111.01 | 96.78 | 127.33 |
| AUCinf (μg· h/mL) | 259 | 234 | 110.64 | 96.59 | 126.74 |
| Pharmacokinetic parameters | Geometric means | | Ratio (%)  (Fed/Fasted) | 90% CI for Ratio (%) | |
| Capsule-Fed | Capsule-Fasted | Lower | Upper |
| N | 28 | 27 | — | — | — |
| Tmax (h) | 3.00 | 2.00 | — | — | — |
| Cmax (μg/mL) | 2.97 | 4.70 | 63.34 | 56.76 | 70.69 |
| AUC0-72h (μg· h/mL) | 106 | 104 | 102.63 | 94.79 | 111.12 |
| AUClast (μg· h/mL) | 267 | 220 | 121.44 | 108.15 | 136.36 |
| AUCinf (μg· h/mL) | 276 | 226 | 122.08 | 108.35 | 137.54 |


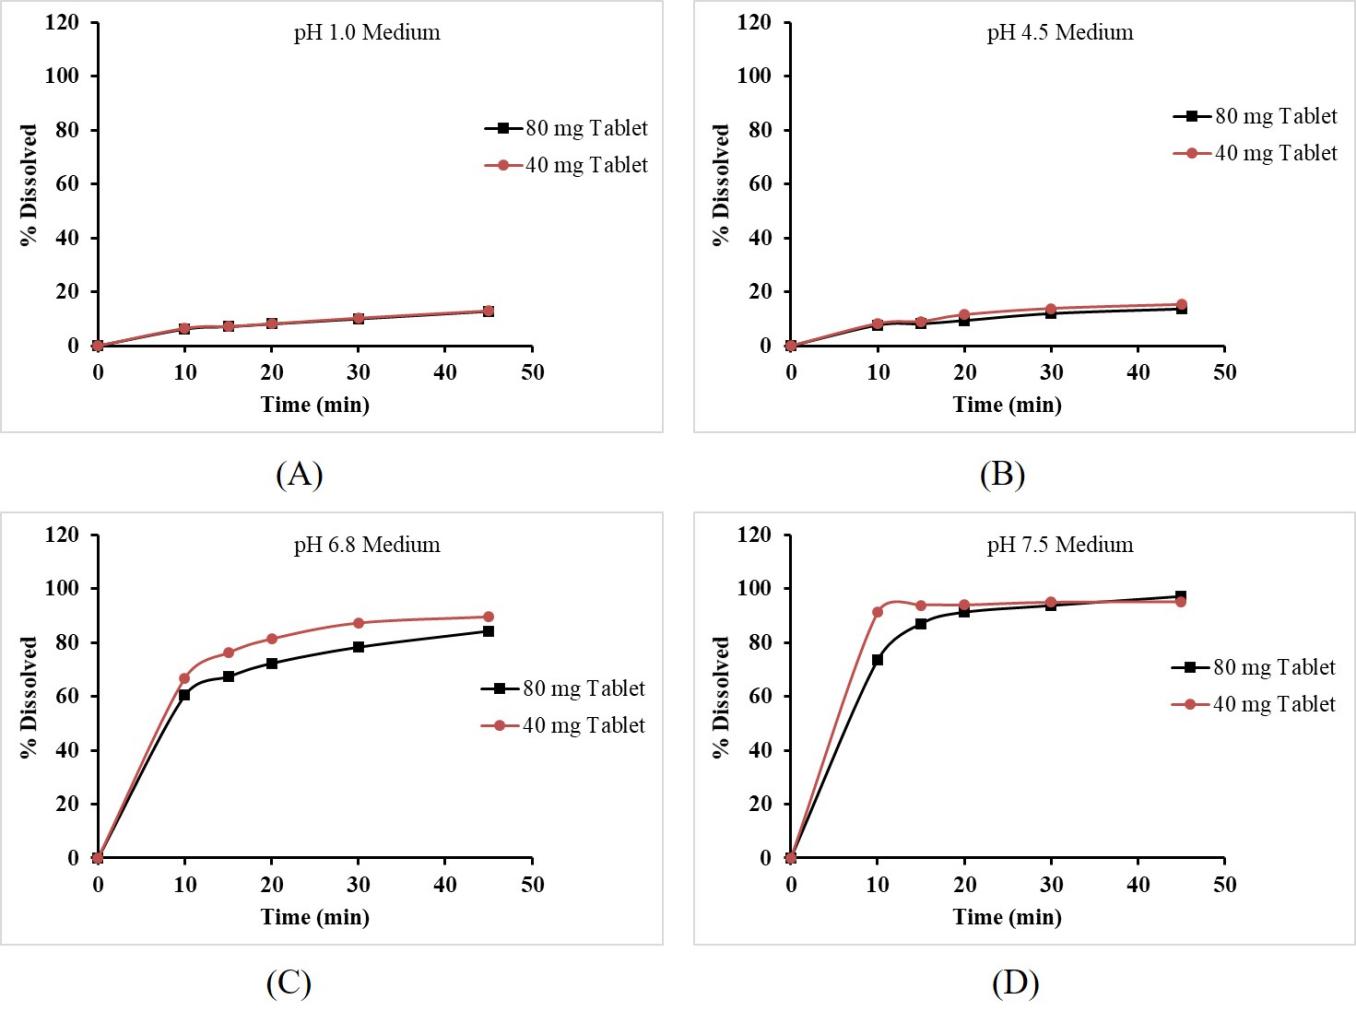


Supplementary Fig. 1. Dissolution profiles of enzalutamide tablet 80 mg and 40 mg in various medium (FDA 2019)

**References**

FDA. 2019. Multiple-discipline review for XTANDI® tablet. https://www.[accessdata.fda.gov/drugsatfda_docs/nda/2020/213674Orig1s000 MultidisciplineR.pdf](https://www.accessdata.fda.gov/drugsatfda_docs/nda/2020/213674Orig1s000MultidisciplineR.pdf)

FDA.2019. Product quality review for XTANDI® tablet. https:// www. [accessdata.fda.gov/drugsatfda_docs/nda/2020/213674Orig1s000ChemR.pdf](https://www.accessdata.fda.gov/drugsatfda_docs/nda/2020/213674Orig1s000ChemR.pdf).
